# Supplementary material for: Lower Interferon Regulatory Factor-8 Expression in Peripheral Myeloid Cells Tracks With Adverse Central Nervous System Outcomes in Treated HIV Infection
Source: Front Immunol. 2019 Nov 29;10:2789. doi: 10.3389/fimmu.2019.02789 (PMC6895026; doi:10.3389/fimmu.2019.02789)
Supplement: Supplementary Table 2 — Complete analyses of correlations of IRF-8 density and neuropsychological testing correlation. Correlations using Kruskal Wallis testing was used to evaluate associations between IRF-8 expression density and measures of neuropsychological tests, including: learning memory, working memory, executive function, psychomotor, and a composite neuropsychological score of the four domains referred to as global. The values reflected in Figure 2 are reflected here in table format as this table. [file Table_2.xlsx]

## Sheet: Suppl Table2
			Classical Monocyte	Intermediate Monocyte	Non-classical Monocyte	mDC	pDC
	Global 14	rho	0.4316	0.4163	0.6457	0.3266	0.1745
		p	0.0737	0.0857	0.0038	0.1859	0.4886
	Learning and Memory	rho	0.5561	0.5318	0.5364	0.2397	0.2105
		p	0.0134	0.0191	0.0179	0.323	0.387
	Psychomotor	rho	-0.2903	-0.2581	-0.07076	-0.1061	-0.03686
		p	0.2143	0.2719	0.7669	0.6561	0.8774
	Executive Function	rho	0.4	0.3618	0.605	0.3401	0.388
		p	0.0806	0.117	0.0047	0.1423	0.091
	Working Memory	rho	0.6115	0.424	0.647	0.4844	0.5611
		p	0.0042	0.0624	0.002	0.0304	0.0101
