# Supplementary material for: Lower Interferon Regulatory Factor-8 Expression in Peripheral Myeloid Cells Tracks With Adverse Central Nervous System Outcomes in Treated HIV Infection
Source: Front Immunol. 2019 Nov 29;10:2789. doi: 10.3389/fimmu.2019.02789 (PMC6895026; doi:10.3389/fimmu.2019.02789)
Supplement: Supplementary Table 4 — Complete analyses of correlations of IRF-8 density and soluble inflammatory markers. Correlations using Kruskal Wallis testing was used to evaluate associations between IRF-8 expression density and soluble inflammatory markers, including: soluble E-Selectin (sE-Selectin), soluble vascular cell adhesion protein 1 (sVCAM-1), soluble intercellular adhesion molecule 1 (sICAM-1), metallomatrixprotein-9 (MMP-9), myeloperoxidase (MPO), plasminogen activator inhibitor-1 (tPAI-1), C-reactive protein (CRP), serum amyloid A (SAA), serum amyloid P component (SAP), interleukins (IL-1β, IL-6, IL-8, IL-10), Tumor necrosis factor alpha (TNF-α), monocyte chemoattractant protein-1 (MCP-1), vascular endothelial growth factor (VEGF), interferon gamma (IFN-γ). Values reflected in Figure 4 are reflected here in table format as this table. [file Table_4.xlsx]

## Sheet: Suppl Table 4
			Classical Monocyte	Intermediate Monocyte	Non-classical Monocyte	mDC	pDC
	soluble E-Selectin	rho	0.06165	-0.1519	0.0143	-0.3431	-0.2226
		p	0.7962	0.5225	0.9523	0.1386	0.3456
	soluble VCAM-1	rho	0.4045	0.2663	0.4259	0.228	0.07068
		p	0.0769	0.2565	0.0612	0.3337	0.7672
	soluble ICAM-1	rho	0.7564	0.5995	0.5342	0.4853	0.4902
		p	0.0001	0.0052	0.0152	0.0301	0.0282
	MMP-9	rho	-0.2195	0.01805	0.01354	0.0602	-0.3429
		p	0.3523	0.9398	0.9548	0.801	0.1389
	MPO	rho	-0.01429	0.1904	0.2672	0.1829	-0.2723
		p	0.9523	0.4214	0.2547	0.4402	0.2455
	tPAI-1	rho	0.1669	0.1903	0.1979	-0.2904	-0.2361
		p	0.4818	0.4216	0.403	0.2141	0.3163
	CRP	rho	0.2136	0.2306	0.1246	-0.02823	0.1158
		p	0.3658	0.328	0.6008	0.906	0.6267
	SAA	rho	0.1595	0.3345	0.2582	0.05307	-0.03761
		p	0.5019	0.1495	0.2717	0.8242	0.8749
	SAP	rho	-0.1774	0.06243	0.0459	-0.1294	-0.3293
		p	0.4542	0.7937	0.8476	0.5866	0.1562
	IL-1b	rho	-0.02984	0.2549	0.237	-0.05187	-0.234
		p	0.9006	0.278	0.3144	0.8281	0.3206
	IL-6	rho	-0.09857	-0.06323	-0.03464	-0.2888	-0.1919
		p	0.6793	0.7911	0.8847	0.2169	0.4177
	IL-8	rho	0.05039	0.01806	-0.1551	-0.06022	-0.1309
		p	0.8329	0.9398	0.5139	0.8009	0.5823
	IL-10	rho	0.1759	0.3204	0.3093	0.1339	0.01353
		p	0.4581	0.1684	0.1846	0.5735	0.9548
	TNFa	rho	0.197	0.2046	0.1407	0.3311	0.3474
		p	0.4052	0.3869	0.5541	0.1539	0.1334
	MCP-1	rho	-0.1654	0	-0.1001	0.03687	-0.1895
		p	0.4858	>0.9999	0.6746	0.8774	0.4237
	VEGF	rho	0.1861	0.1387	0.2465	0.3671	0.09567
		p	0.4322	0.5599	0.2948	0.1113	0.6883
	IFN-g	rho	0.2764	0.4531	0.228	-0.1579	-0.1152
		p	0.2382	0.0448	0.3337	0.5062	0.6286
