# Supplementary material for: Lower Interferon Regulatory Factor-8 Expression in Peripheral Myeloid Cells Tracks With Adverse Central Nervous System Outcomes in Treated HIV Infection
Source: Front Immunol. 2019 Nov 29;10:2789. doi: 10.3389/fimmu.2019.02789 (PMC6895026; doi:10.3389/fimmu.2019.02789)
Supplement: Supplementary Table 6 — Values of NPZ scores in each subject. Actual values of NPZ scores in each subject are shown in the table. [file Table_6.xlsx]

## Sheet: Suppl Table6
	Subject ID	Global 14	Learning and Memory	Psychomotor	Executive Function	Working Memory	Psychomotor Attention
	30	0.66	0.11	1.56	0.38	-1.48	1.12
	87	0.68	-1.06	0.69	1.82	0.45	1
	92	-0.05	-1.24	1	-0.43	-0.61	0.63
	111	0.03	-1.03	0.26	1.34	0.76	0.11
	114	-0.64	-0.3	0.27	-0.5	-0.45	-0.68
	123	-0.16	0.89	0.07	-0.34	-0.28	-0.48
	135	N/A	0.63	0.38	1	0.24	N/A
	136	0.31	0.6	-0.5	0.51	0.19	-0.02
	145	0.83	1.57	1.06	1.15	1.12	0.53
	152	-0.27	-1.6	0.73	-0.42	-0.77	0.38
	153	-1.17	-2.12	-0.54	-1.26	-0.79	-0.58
	154	-0.52	-0.83	0.36	0.31	-0.43	-0.59
	181	-0.03	0.58	-0.32	0.36	0.63	-0.55
	204	-0.98	-0.97	-0.42	-1.84	-0.98	-1.35
	210	0.1	0.31	-0.08	0.85	0.21	-0.19
	221	-0.05	-1	0.27	0.9	0.57	-0.04
	222	N/A	N/A	-1.45	-1.49	-0.39	-3.44
	226	0.79	0.52	0.95	2.11	0.4	0.56
	243	-0.65	-2.3	0.52	0.24	-1.17	-0.28
	245	0.63	1.29	0.37	0.34	-0.98	0.2
